# Supplementary material for: A super stable assembled P nanowire with variant structural and magnetic/electronic properties via transition metal adsorption
Source: Royal Society of Chemistry journal article supplement (doi:10.1039/d0nr02176h), 2020-01-01
Supplement: d0nr02176h1.pdf [file d0nr02176h1.pdf]

## Supplemental Information

# A super stable assembled P nanowire with variant structural and magnetic/electronic properties via transition metal adsorption

Shukai Wang,<sup>a,#</sup> Jinxing Gu,<sup>b,#</sup> Yinan Dong,<sup>a</sup> Linwei Sai,<sup>c</sup> Fengyu Li,<sup>a,\*</sup>

<sup>a</sup> School of Physical Science and Technology, Inner Mongolia University, Hohhot, 010021, China

<sup>b</sup> Department of Chemistry, The Institute for Functional Nanomaterials, University of Puerto Rico, Rio Piedras Campus, San Juan, PR 00931, USA

<sup>c</sup> College of Science, Hohai University, Changzhou 213022, China

\* Corresponding Author: fengyuli@imu.edu.cn (FL); zhaojj@dlut.edu.cn (JZ)

# Equal contributions

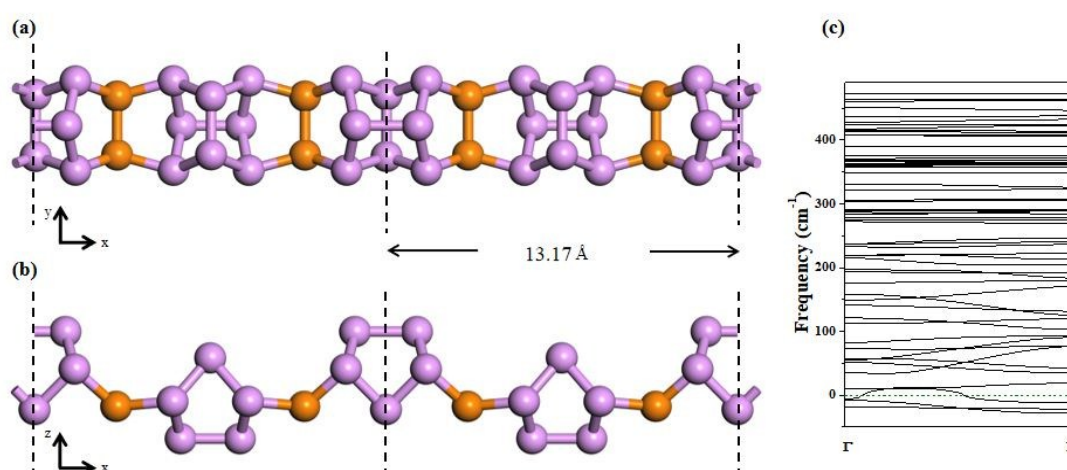

**Fig. S1** Two views (a,b) and the calculated phonon spectrum (c) of the 1D-P<sub>20</sub> NW. The unitcell was marked by black dashed lines. The P<sub>2</sub> dimers are in orange.

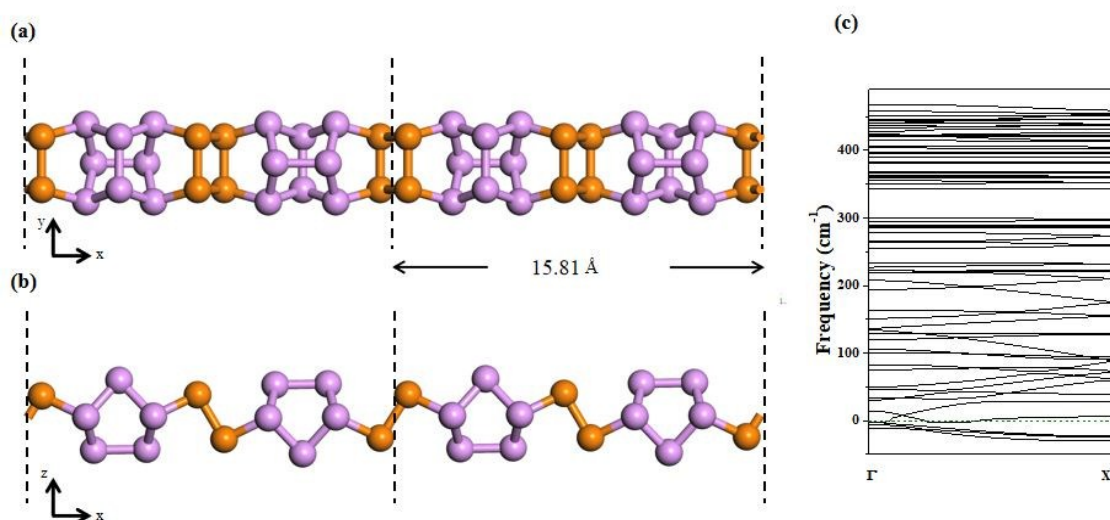

**Fig. S2** Two views (a,b) and the calculated phonon spectrum (c) of the 1D-P<sub>24</sub> NW. The unitcell was marked by black dashed lines. The P<sub>2</sub> dimers are in orange.

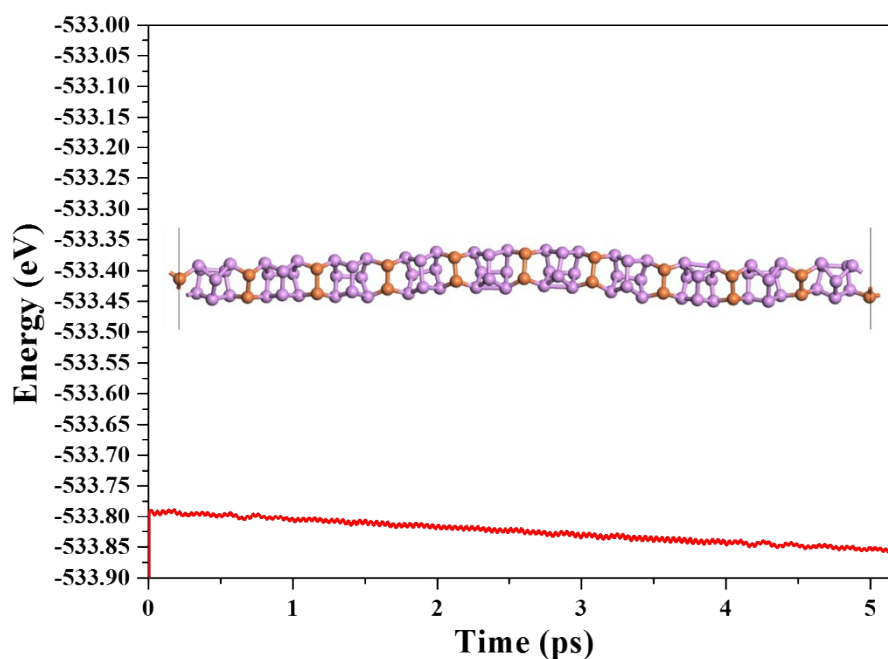

**Fig. S3** The evolution of total energies of the 1D-P<sub>10</sub> NW (a 10×1×1 supercell, 100 P atoms in total) and the structural snapshot of the MD simulation at 300 K for at the end of 5.2 ps. The P<sub>2</sub> dimers are in orange.

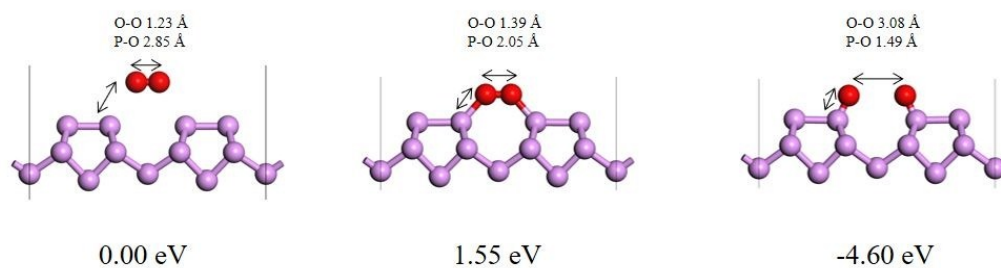

**Fig. S4** The adsorption and dissociation behaviors of the 1D- $P_{10}$  NW regarding to  $O_2$  molecules, as well as the changes in bond length.

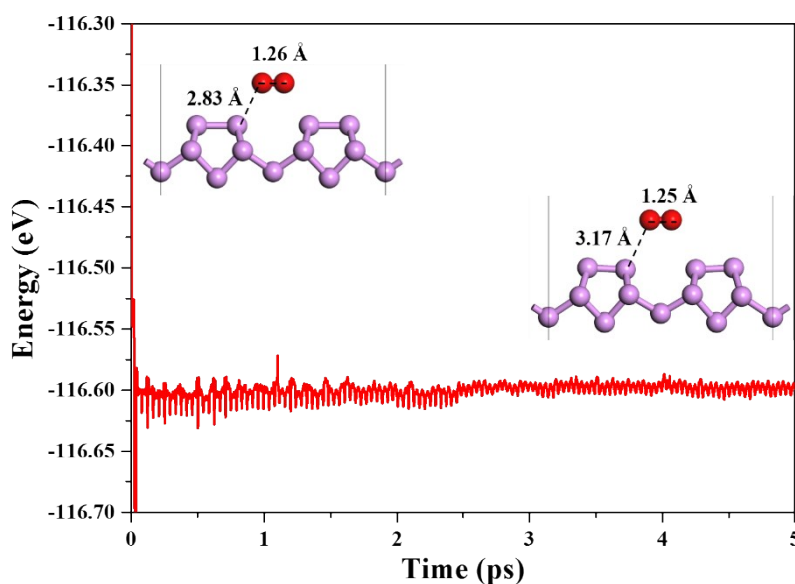

**Fig. S5** The evolution of total energies of the 1D- $P_{10}$  NW (a  $2 \times 1 \times 1$  supercell) with one  $O_2$  molecule and the structural snapshot of the MD simulation at 500 K for at the end of 5 ps.

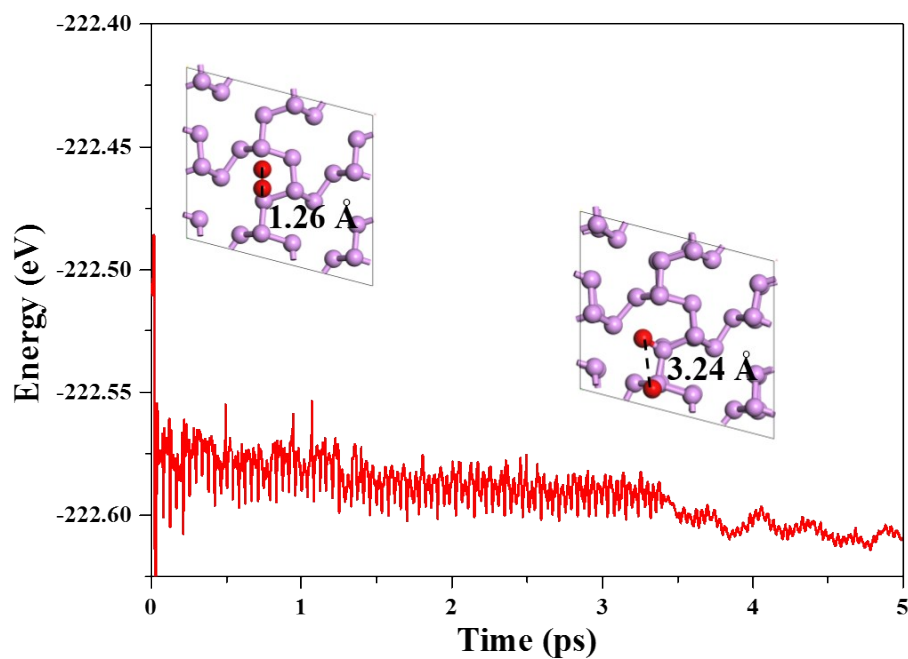

**Fig. S6** The evolution of total energies of the 2D  $\theta$ -P (a  $2 \times 2 \times 1$  supercell) with one  $O_2$  molecule and the structural snapshot of the MD simulation at 300 K for at the end of 5 ps.

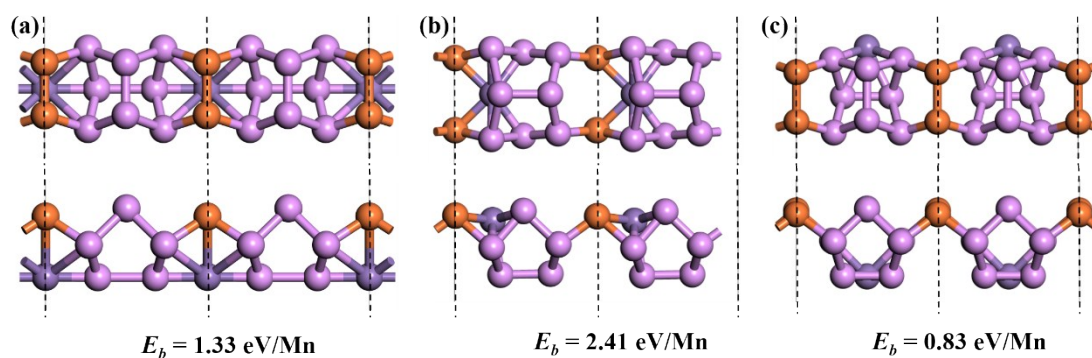

**Fig. S7** Two views of the three optimized structures of  $Mn_1@1D-P_{10}$ :  $Mn_1$ -A (a),  $Mn_1$ -B (b),  $Mn_1$ -C (c). The  $P_2$  dimers are in orange.

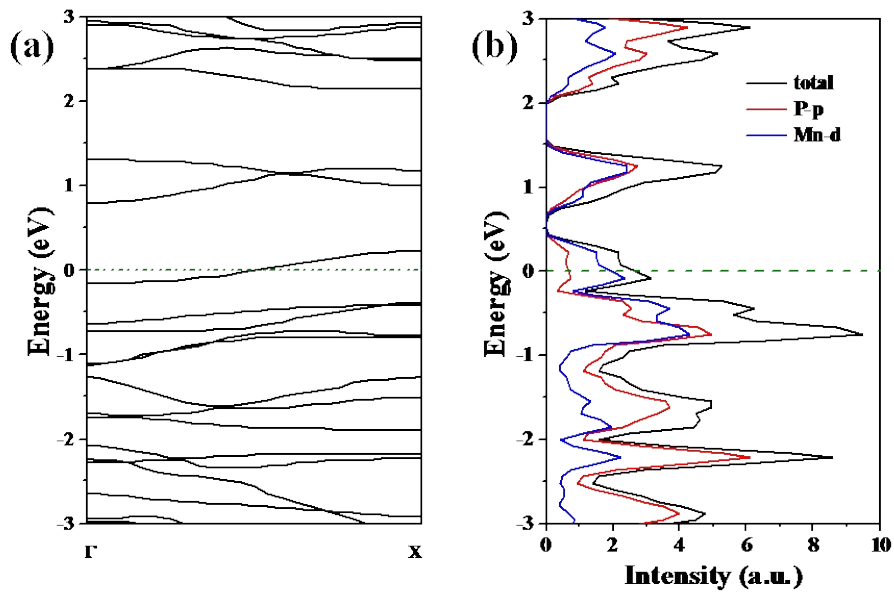

**Fig. S8** The PBE+U band structure (a) and density of states (b) of the 1D-Mn<sub>1</sub>@P<sub>10</sub> with Mn adsorbed at the Mn<sub>1</sub>-B site.

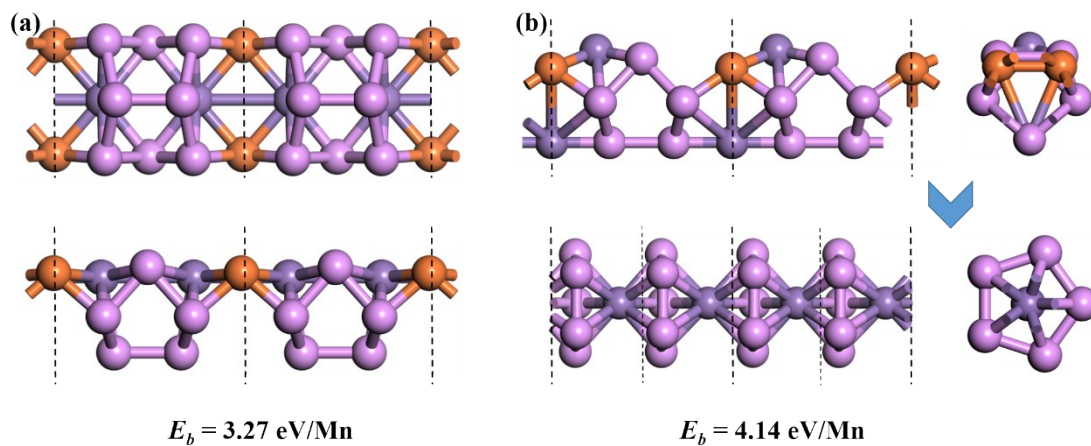

**Fig. S9** Two views of the two optimized structures of Mn<sub>2</sub>@1D-P<sub>10</sub>: Mn<sub>2</sub>-BB (a), Mn<sub>2</sub>-BA (b). The P<sub>2</sub> dimers are in orange.

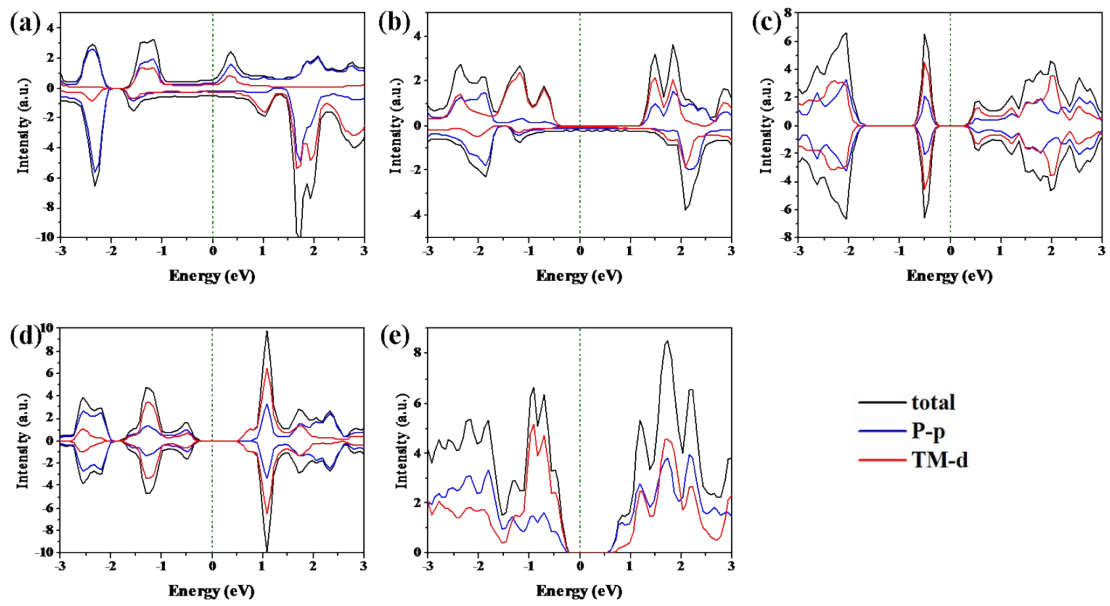

**Fig. S10** The density of states of sandwich 1D-Mn<sub>2</sub>@P<sub>10</sub> (a), 1D-V<sub>1</sub>@P<sub>5</sub> (b), 1D-Cr<sub>2</sub>@P<sub>10</sub> (c), 1D-Fe<sub>2</sub>@P<sub>10</sub> (d), and 1D-Mo<sub>2</sub>@P<sub>10</sub> (e) NWs. The Fermi level is set at 0 eV.

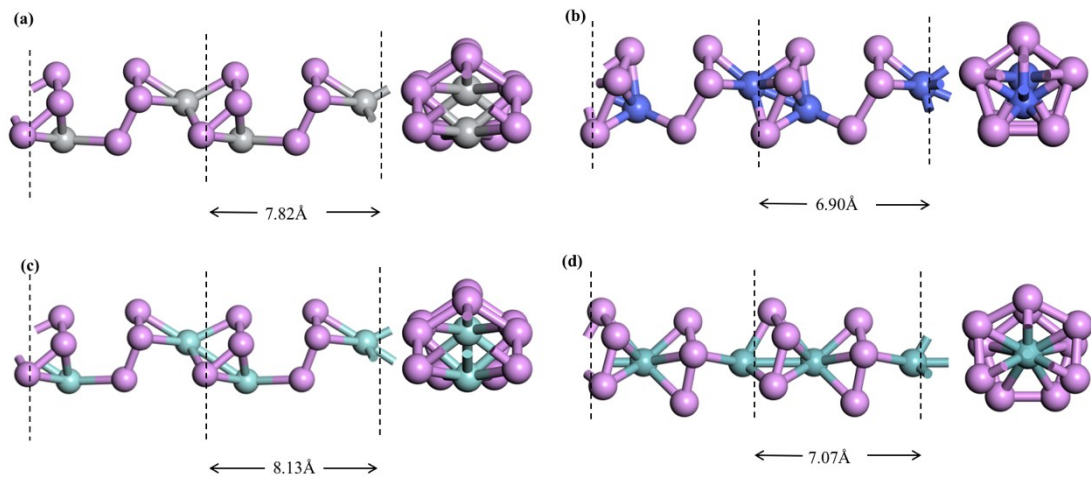

**Fig. S11** Two views of the optimized structures of 1D-Ti<sub>2</sub>@P<sub>10</sub> (a), 1D-Co<sub>2</sub>@P<sub>10</sub> (b), 1D-Zr<sub>2</sub>@P<sub>10</sub> (c), and 1D-Nb<sub>2</sub>@P<sub>10</sub> (d).

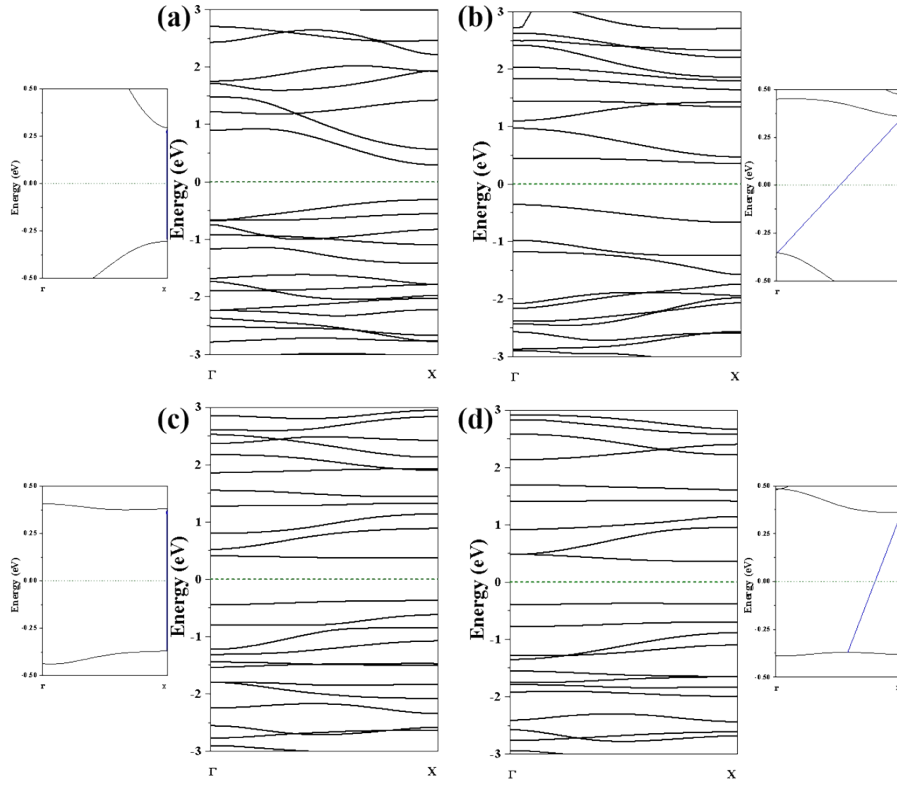

**Fig. S12** The PBE+U band structures of quasi-sandwich chains 1D-Co<sub>2</sub>@P<sub>10</sub> (a), 1D-Nb<sub>2</sub>@P<sub>10</sub> (b), 1D-Ti<sub>2</sub>@P<sub>10</sub> (c), and 1D-Zr<sub>2</sub>@P<sub>10</sub> (d) NWs. The Fermi level is set at 0 eV. The zoomed insets indicate the direct-bandgap feature in the 1D-Co<sub>2</sub>@P<sub>10</sub> and 1D-Ti<sub>2</sub>@P<sub>10</sub>, and indirect-bandgap character in the 1D-Nb<sub>2</sub>@P<sub>10</sub> and 1D-Zr<sub>2</sub>@P<sub>10</sub> NWs, respectively.



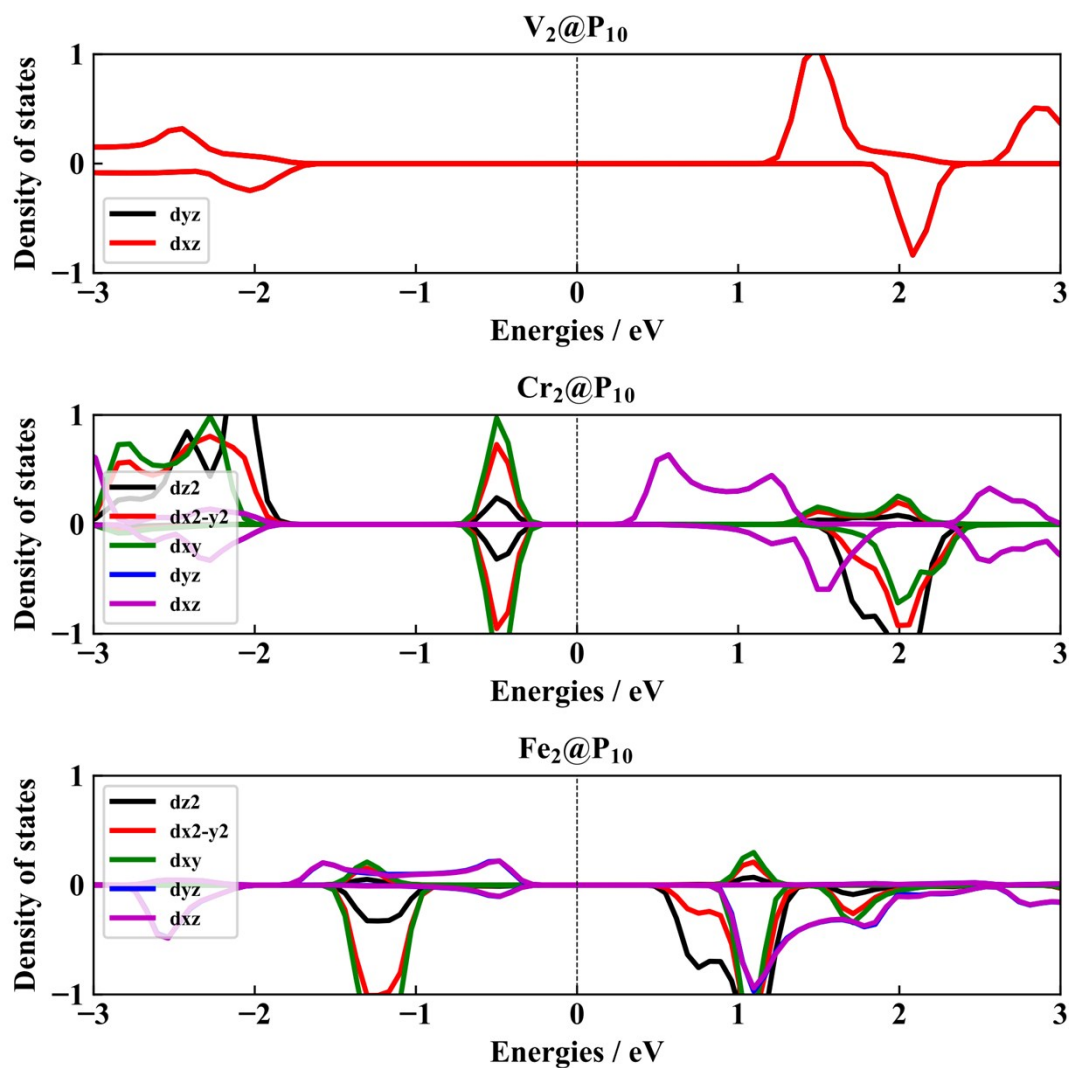

**Fig. S13** The local density of states for orbital  $d_{xz}$  and  $d_{yz}$  of V@P<sub>5</sub> clearly show that the two orbitals are degenerated. For Cr<sub>2</sub>@P<sub>10</sub> and Fe<sub>2</sub>@P<sub>10</sub>, lines representing orbital  $d_{xz}$  and  $d_{yz}$  are also overlapped, while lines for  $d_{xy}$  and  $d_{x^2-y^2}$  orbitals are not exactly overlapped, because these orbitals have complex interactions with P<sub>5</sub> rings due to their low energies.



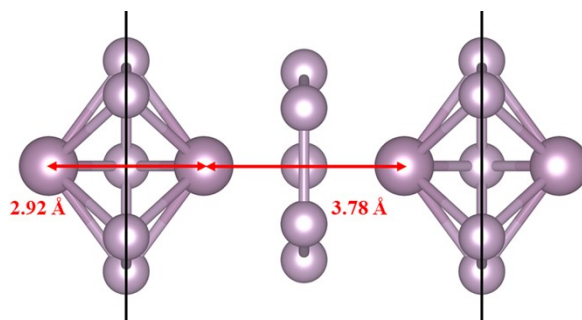

**Fig. S14** The illustration of Mo...Mo separations in the Mo<sub>2</sub>@P<sub>10</sub> nanowire.

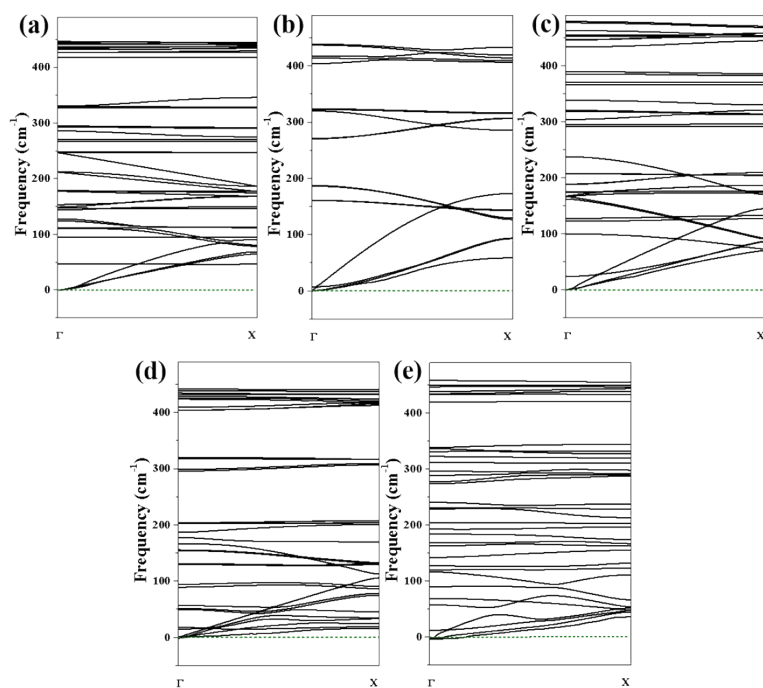

**Fig. S15** The calculated phonon spectra of the sandwich chains 1D-Mn<sub>2</sub>@P<sub>10</sub> (a), 1D-V<sub>1</sub>@P<sub>5</sub> (b), 1D-Cr<sub>2</sub>@P<sub>10</sub> (c), 1D-Fe<sub>2</sub>@P<sub>10</sub> (d), and 1D-Mo<sub>2</sub>@P<sub>10</sub> (e).

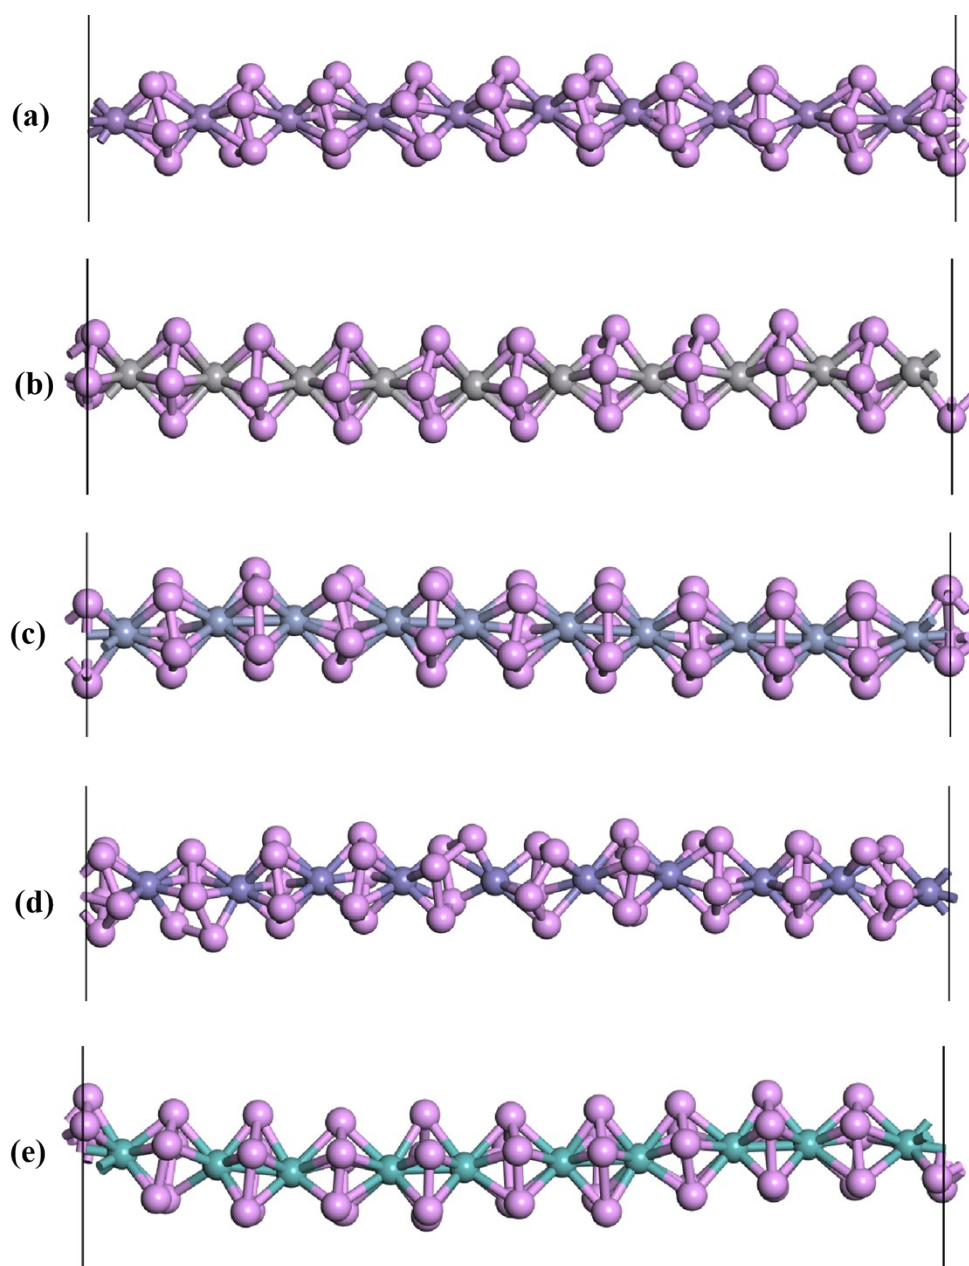

**Fig. S16** The final structures of 1D  $\text{TM}_2@\text{P}_{10}$  chains through a 5 ps MD simulation at room temperature ( $T = 300\text{ K}$ ): (a)  $\text{TM} = \text{Mn}$ , (b)  $\text{TM} = \text{V}$ , (c)  $\text{TM} = \text{Cr}$ , (d)  $\text{TM} = \text{Fe}$ , (e)  $\text{TM} = \text{Mo}$ .

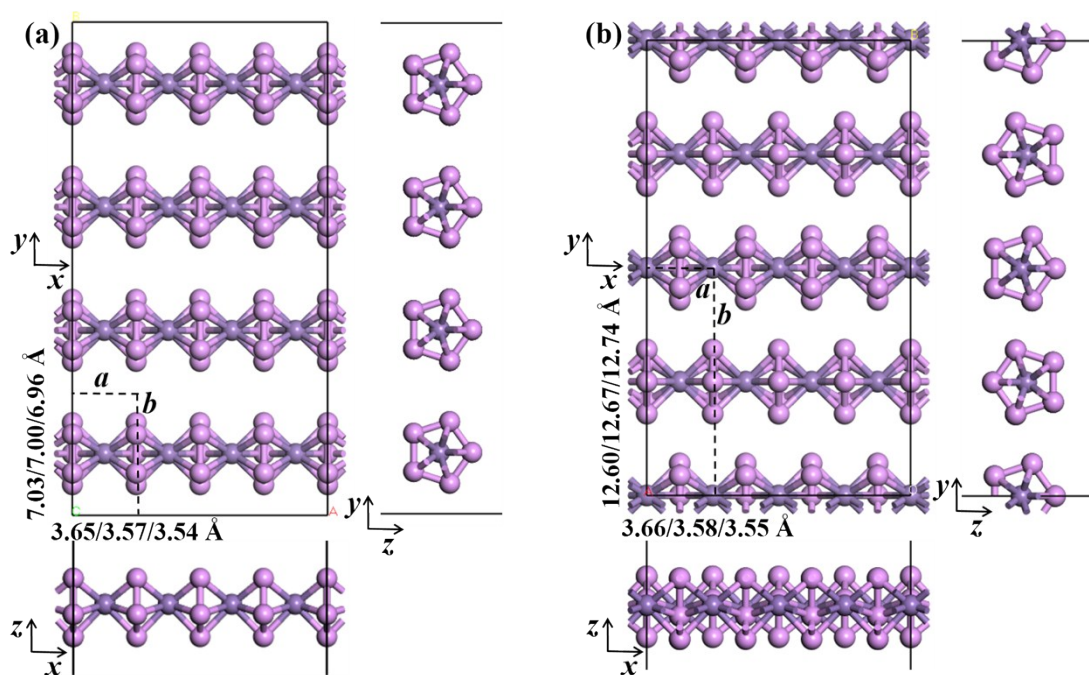

**Fig. S17** The top and two side views of the vdW-type 2D sheets in (a) Type-I ( $\text{TM}_1@P_5$ ) and (b) Type-II ( $\text{TM}_2@P_{10}$ ) configurations, TM = Mn/V/Cr.

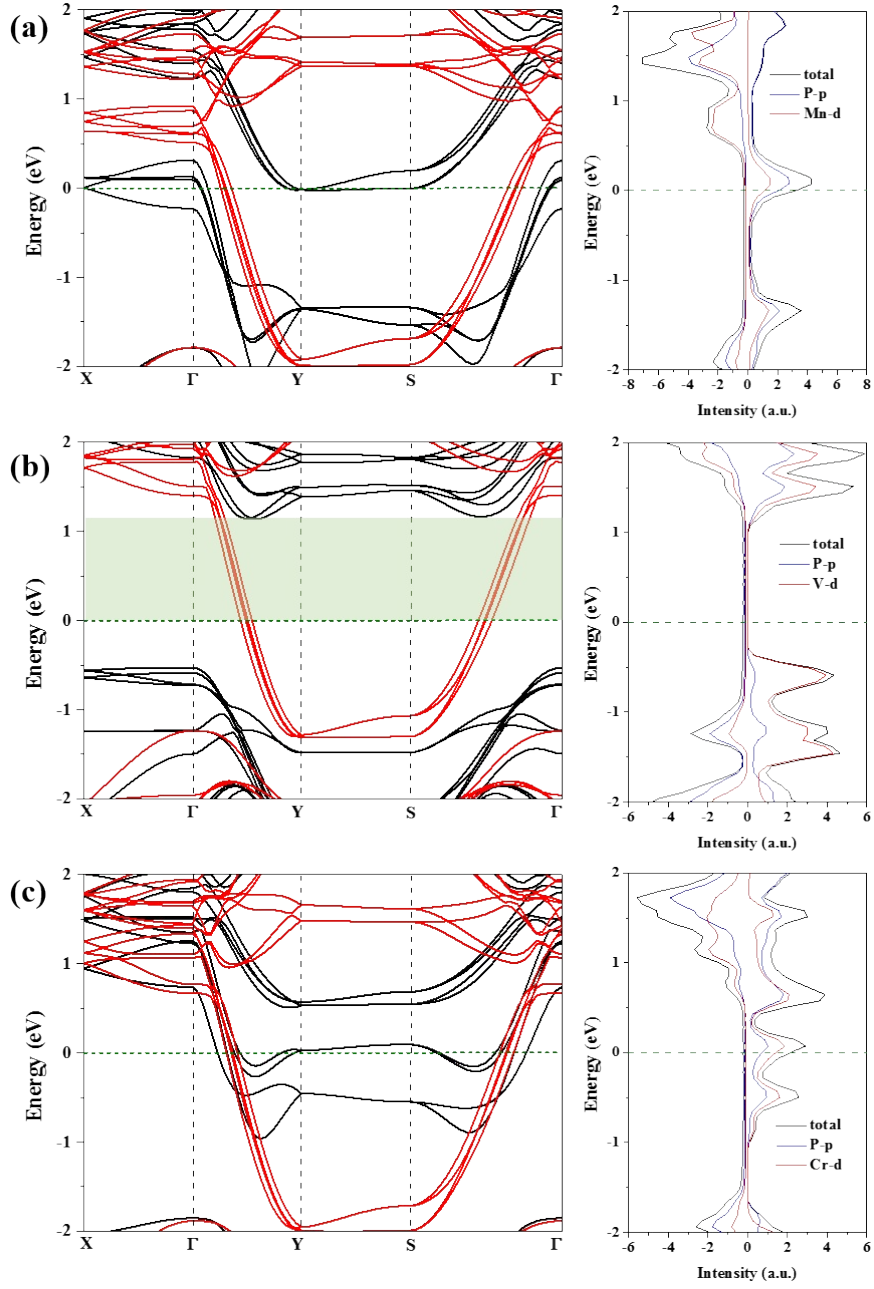

**Fig. S18** The band structures (left) and density of states (right) of the vdW-type 2D sheets in Type-II ( $\text{TM}_2@P_{10}$ ) configuration (a)  $\text{TM} = \text{Mn}$ , (b)  $\text{TM} = \text{V}$ , (c)  $\text{TM} = \text{Cr}$ .

**Table S1.** The relative energies ( $\Delta E$ , in eV) between FM and AFM states of the sandwich  $1\text{D-TM}_2@P_{10}$  ( $\text{TM} = \text{Mn}, \text{V}, \text{Cr}, \text{Fe}, \text{Mo}$ ) chains.

|     | Mn   | V    | Cr    | Fe    | Mo   |
|-----|------|------|-------|-------|------|
| FM  | 0.00 | 0.00 | 0.00  | 0.00  | 0.00 |
| AFM | 0.77 | 0.77 | -0.30 | -0.28 | 0.00 |

**Table S2.** The magnetic anisotropy energy (*MAE*, in meV/TM atom) and the easy axis (EA) for the sandwich 1D-Mn<sub>2</sub>@P<sub>10</sub> and 1D-V<sub>1</sub>@P<sub>5</sub> chains. The 1D NWs is along *x* axis, the 2D systems are in the *xy* plane.

|                                         | E(001)–E(100) | E(010)–E(100) | E(011)–E(100) | E(101)–E(100) | E(110)–E(100) | E(111)–E(100) | EA    |
|-----------------------------------------|---------------|---------------|---------------|---------------|---------------|---------------|-------|
| <b>1D-Mn<sub>2</sub>@P<sub>10</sub></b> | 0.001         | 0.292         | 0.207         | 0.289         | 0.133         | 0.276         | (100) |
|                                         | E(001)–E(100) | E(010)–E(100) | E(011)–E(100) | E(101)–E(100) | E(110)–E(100) | E(111)–E(100) | EA    |
| <b>1D-V<sub>1</sub>@P<sub>5</sub></b>   | 0.010         | 0.291         | 0.154         | 0.086         | 0.286         | 0.027         | (100) |
|                                         |               |               |               |               |               |               |       |
|                                         | E(001)–E(101) | E(010)–E(101) | E(100)–E(101) | E(011)–E(101) | E(110)–E(101) | E(111)–E(101) | EA    |
| <b>2D-Mn<sub>2</sub>@P<sub>10</sub></b> | 0.383         | 0.243         | 0.385         | 0.194         | 0.282         | 0.370         | (101) |
|                                         | E(001)–E(100) | E(010)–E(100) | E(011)–E(100) | E(101)–E(100) | E(110)–E(100) | E(111)–E(100) | EA    |
| <b>2D-V<sub>2</sub>@P<sub>10</sub></b>  | 0.002         | 0.314         | 0.166         | 0.317         | 0.085         | 0.004         | (100) |
|                                         | E(001)–E(101) | E(010)–E(101) | E(100)–E(101) | E(011)–E(101) | E(110)–E(101) | E(111)–E(101) | EA    |
| <b>2D-Cr<sub>2</sub>@P<sub>10</sub></b> | 0.358         | 0.005         | 0.119         | 0.122         | 0.210         | 0.127         | (101) |

**Table S3.** The calculated number of electrons in each d suborbital for one Cr ion in the Cr<sub>2</sub>@P<sub>10</sub> sandwich chain.

| <b>Orbitals</b>    | <b>Up electron</b> | <b>Down electron</b> |
|--------------------|--------------------|----------------------|
| d <sub>xy</sub>    | 0.78               | 0.30                 |
| d <sub>x2-y2</sub> | 0.82               | 0.23                 |
| d <sub>xz</sub>    | 0.43               | 0.26                 |
| d <sub>yz</sub>    | 0.43               | 0.26                 |
| d <sub>z2</sub>    | 0.88               | 0.11                 |
